# Supplementary material for: A novel sensor for sensitive determination of atropine based on a Co3O4-reduced graphene oxide modified carbon paste electrode
Source: Royal Society of Chemistry journal article supplement (doi:10.1039/c5nj00133a), 2015-01-01
Supplement: c5nj00133a1.pdf [file c5nj00133a1.pdf]

## Electronic Supplementary Information (ESI)

# Novel sensor for sensitive determination of atropine based on $\text{Co}_3\text{O}_4$ -reduced graphene oxide modified carbon paste electrode

Hasan Bagheri,<sup>\*a</sup> Seyedeh Maryam Arab,<sup>b</sup> Hosein Khoshafar,<sup>c</sup> and Abbas Afkhami<sup>d</sup>

<sup>a</sup> *Chemical Injuries Research Center, Baqiyatallah University of Medical Sciences, Tehran, Iran.*

<sup>b</sup> *Research Center of Shaygan Shimi Chemical Co., Hamedan, Iran*

<sup>c</sup> *Young Researchers Club, Hamedan Branch, Islamic Azad University, Hamedan, Iran*

<sup>d</sup> *Faculty of Chemistry, Bu-Ali Sina University, Hamedan, Iran*

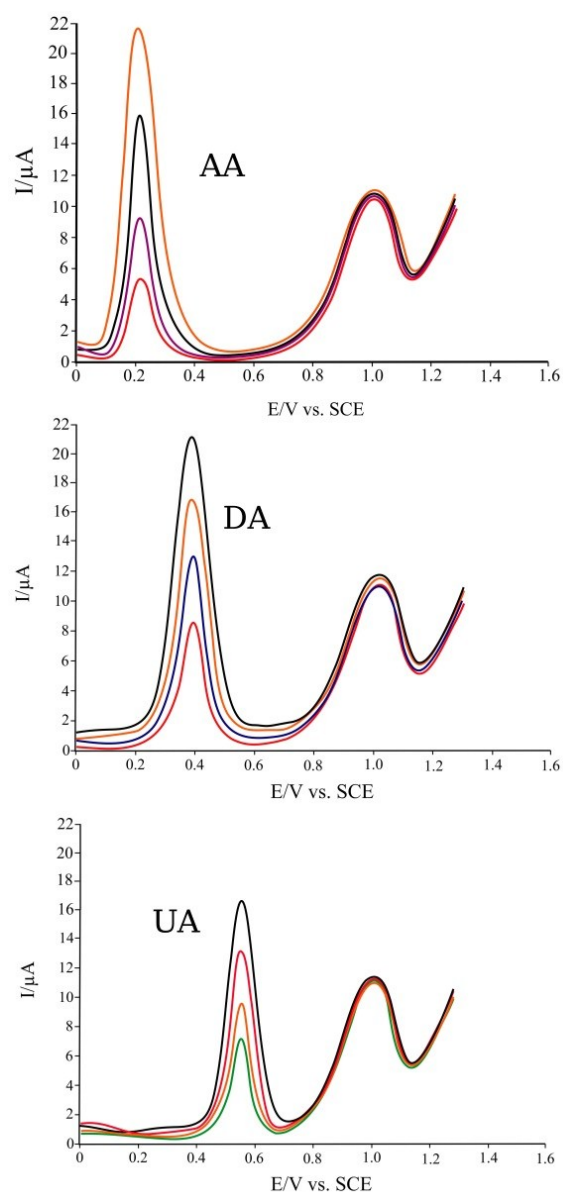

**Figure S1.** (a) DPV of 2.0  $\mu\text{M}$  AT on  $\text{Co}_3\text{O}_4\text{-rGO/CPE}$  (a) in the presence of ascorbic acid (15.0-40.0  $\mu\text{M}$ ) (b) in the presence of dopamine (10.0-30.0  $\mu\text{M}$ ) and (c) in the presence of uric acid (8.0-40.0  $\mu\text{M}$ )
